# Supplementary material
Source: PubMed Central journal article supplement (PMC6310802)
Supplement: pnas.1811068115.sapp.pdf [file pnas.1811068115.sapp.pdf]

## Supplementary Information for

### Climate network percolation reveals the expansion and weakening of the tropical component under global warming

Jingfang Fan, Jun Meng, Yosef Ashkenazy, Shlomo Havlin and Hans Joachim Schellnhuber

Hans Joachim Schellnhuber, E-mail: [john@pik-potsdam.de](mailto:john@pik-potsdam.de)  
or Jingfang Fan, E-mail: [jingfang@pik-potsdam.de](mailto:jingfang@pik-potsdam.de)

#### This PDF file includes:

Figs. S1 to S8  
Table S1  
Caption for Movie S1

#### Other supplementary materials for this manuscript include the following:

Movie S1

**Table S1. CMIP5 climate simulation models used in this study. Resolutions are given as the number of latitude×longitude grid points.**

| Source         | RCP8.5 | RCP4.5 | Historical | Resolution | Label number |
|----------------|--------|--------|------------|------------|--------------|
| ACCESS1-0      | YES    | NO     | YES        | 145 × 192  | 1            |
| ACCESS1-3      | YES    | YES    | YES        | 145 × 192  | 2            |
| CCSM4          | YES    | YES    | YES        | 192 × 288  | 3            |
| CMCC-CESM      | YES    | NO     | YES        | 48 × 96    | 4            |
| CMCC-CM        | YES    | YES    | YES        | 240 × 480  | 5            |
| CMCC-CMS       | YES    | YES    | YES        | 96 × 192   | 6            |
| CNRM-CM5       | YES    | NO     | YES        | 128 × 256  | 7            |
| CSIRO-Mk3-6-0  | YES    | YES    | YES        | 145 × 192  | 8            |
| CanESM2        | YES    | YES    | YES        | 96 × 192   | 9            |
| GFDL-CM3       | YES    | YES    | YES        | 64 × 128   | 10           |
| GFDL-ESM2G     | YES    | NO     | YES        | 90 × 144   | 11           |
| GFDL-ESM2M     | YES    | YES    | YES        | 90 × 144   | 12           |
| GISS-E2-H      | YES    | YES    | YES        | 90 × 144   | 13           |
| GISS-E2-H-CC   | YES    | YES    | YES        | 90 × 144   | 14           |
| GISS-E2-R      | YES    | YES    | YES        | 90 × 144   | 15           |
| GISS-E2-R-CC   | YES    | YES    | YES        | 90 × 144   | 16           |
| HadGEM2-AO     | YES    | YES    | YES        | 145 × 192  | 17           |
| HadGEM2-CC     | YES    | NO     | YES        | 145 × 192  | 18           |
| HadGEM2-ES     | YES    | YES    | YES        | 145 × 192  | 19           |
| inmcm4         | YES    | YES    | YES        | 120 × 180  | 20           |
| IPSL-CM5A-LR   | YES    | NO     | YES        | 96 × 96    | 21           |
| IPSL-CM5A-MR   | YES    | NO     | YES        | 143 × 144  | 22           |
| IPSL-CM5B-LR   | YES    | NO     | YES        | 96 × 96    | 23           |
| MIROC-ESM      | YES    | NO     | YES        | 64 × 128   | 24           |
| MIROC-ESM-CHEM | YES    | NO     | YES        | 64 × 128   | 25           |
| MPI-ESM-LR     | YES    | YES    | YES        | 96 × 192   | 26           |
| MPI-ESM-MR     | YES    | YES    | YES        | 96 × 192   | 27           |
| MRI-CGCM3      | YES    | YES    | YES        | 160 × 320  | 28           |
| MRI-ESM1       | YES    | NO     | YES        | 160 × 320  | 29           |
| NorESM1-M      | YES    | YES    | YES        | 96 × 144   | 30           |
| NorESM1-ME     | YES    | YES    | YES        | 96 × 144   | 31           |

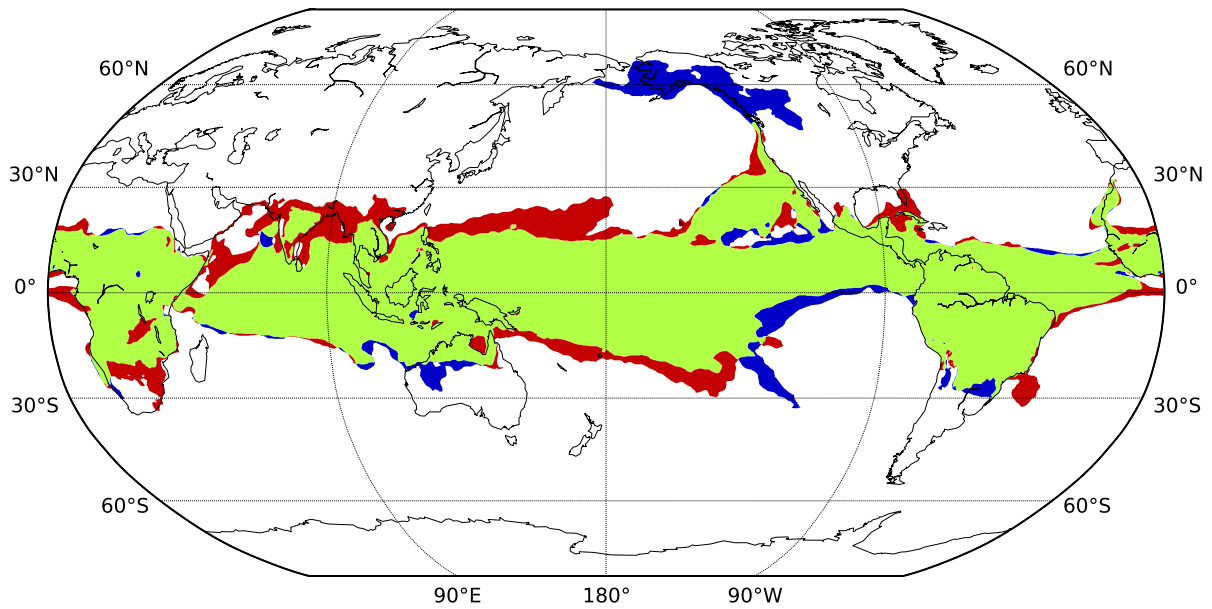

**Fig. S1.** The difference in the tropical percolation component between the first and the last five years of the ERA-Interim data. In the map, the green, blue and red colors represent the stable, removing and adding nodes, respectively.

## ERA Interim

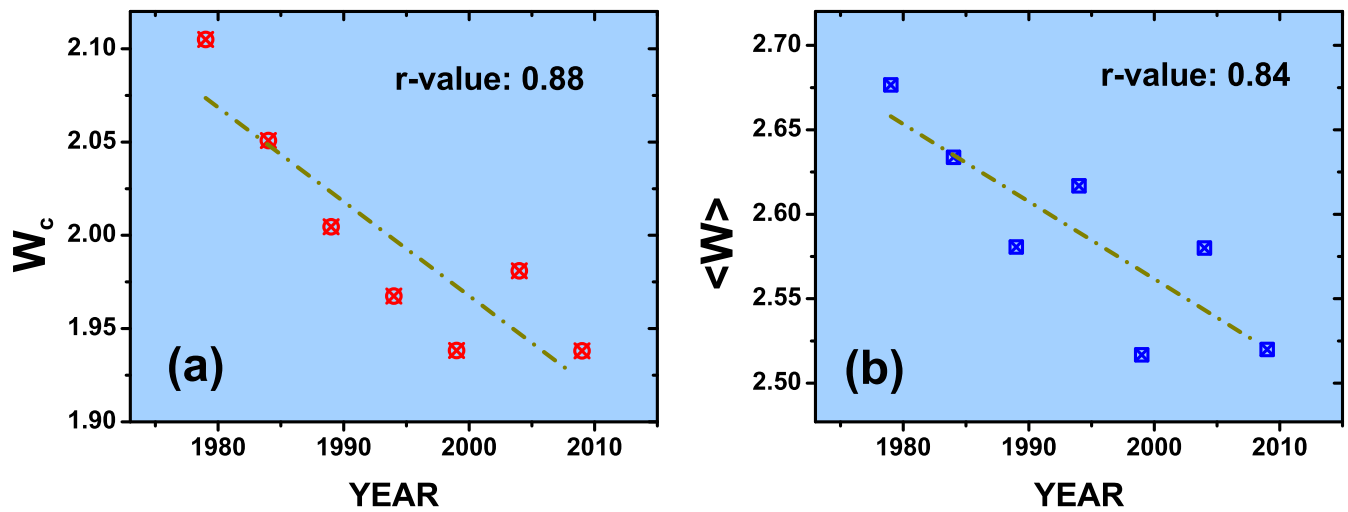

Fig. S2. The decrease in the intensity of the tropical component for the ERA-Interim reanalysis data with time. (a) For the weight of the critical bond or link; (b) the average of the weights of all added links before the percolation threshold.

### ERA Interim

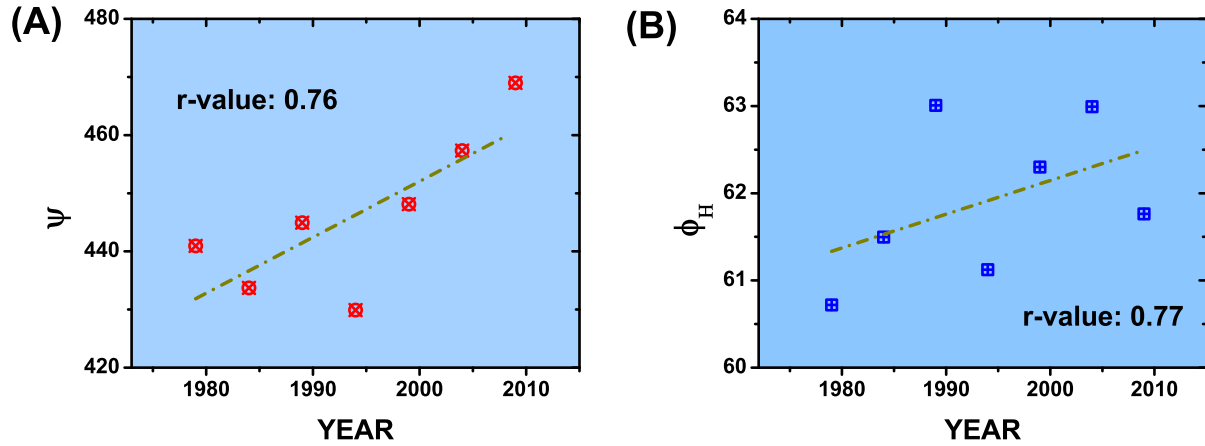

### RCP8.5, MIROC-ESM

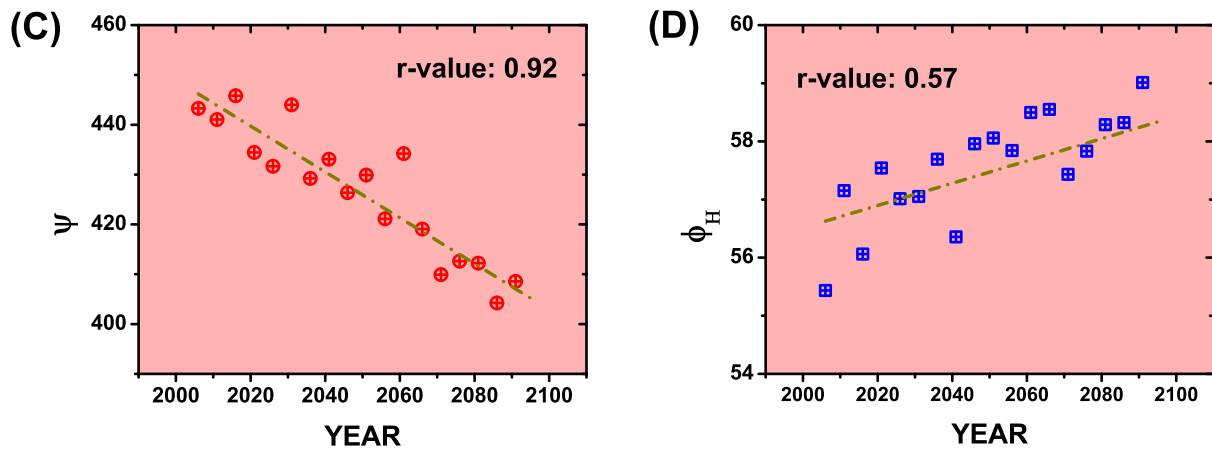

**Fig. S3.** Changes in the intensity,  $\Psi$ , and width,  $\phi_H$ , of the HC against time for (A-B) the ERA-Interim reanalysis data and (C-D) for a model under the RCP8.5 scenario. Linear correlation coefficients (r-values) are given in the plots.

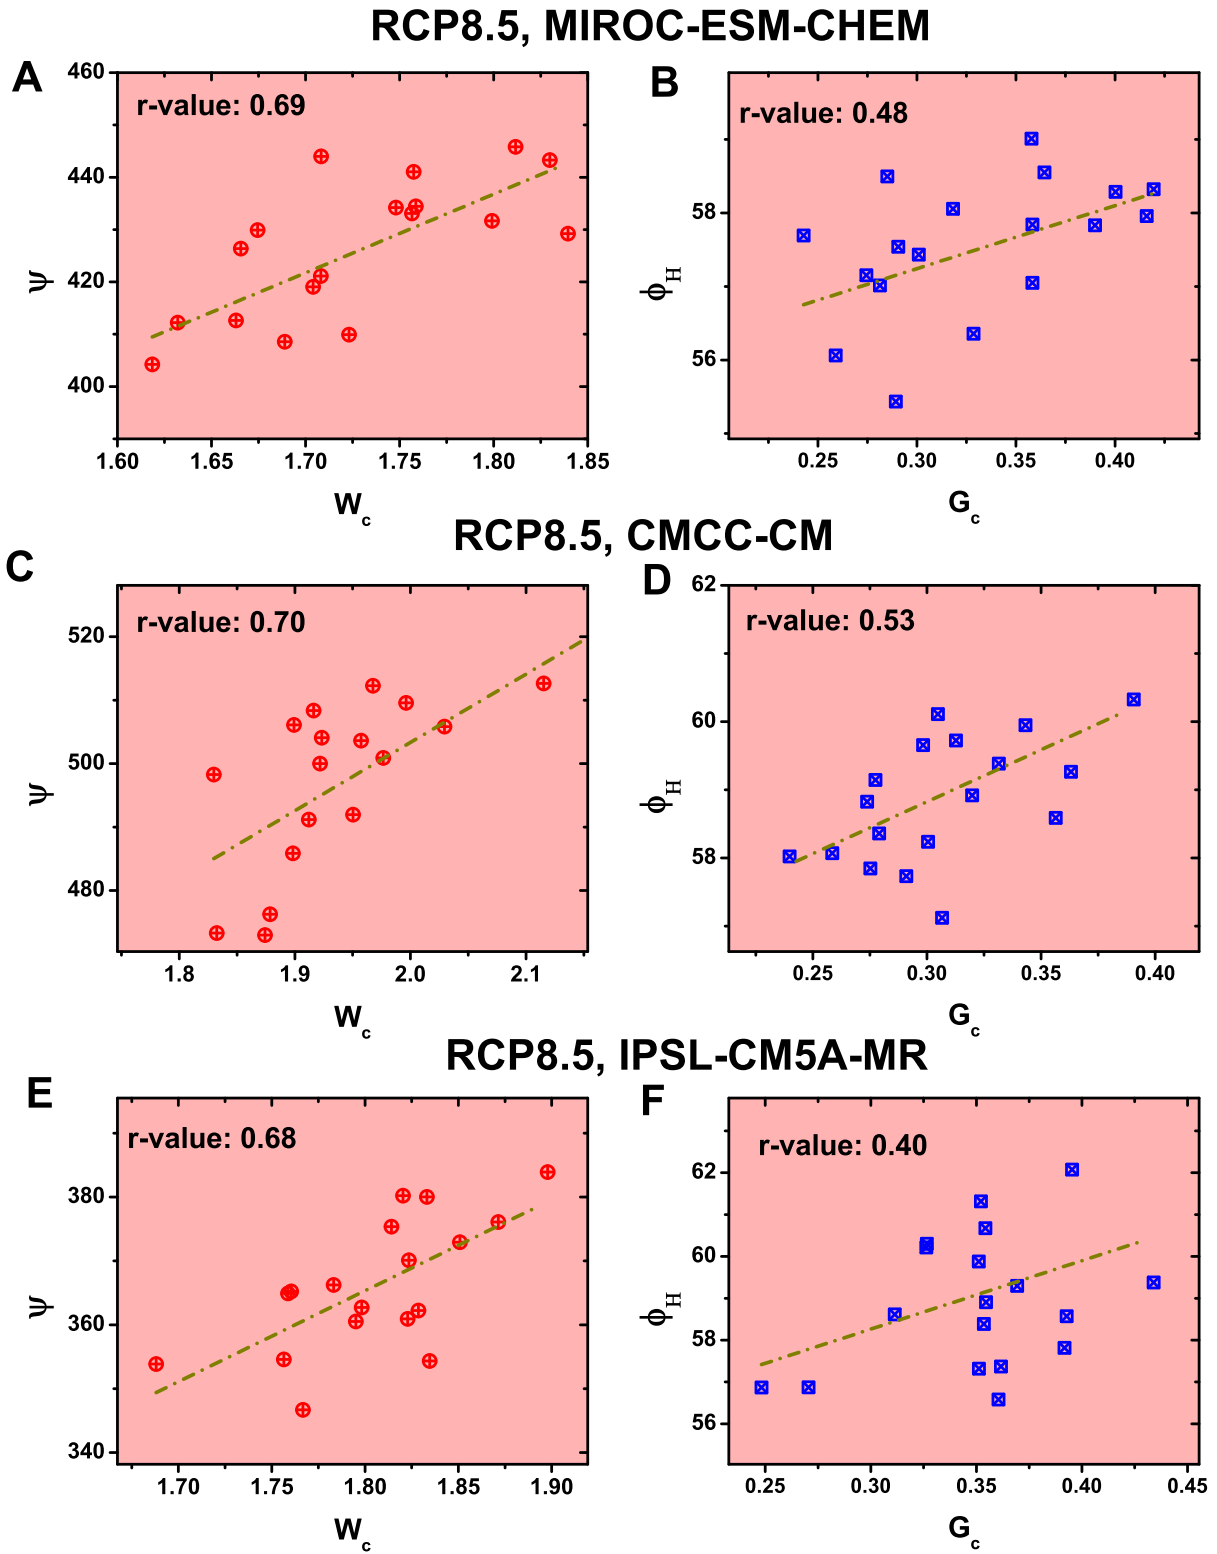

Fig. S4. Strong linear relationship between network variables ( $W_c$ ,  $G_c$ ) and Hadley cell indices ( $\psi$ ,  $\phi_H$ ). (A-B) For model MIROC-ESM-CHEM; (C-D) for CMCC-CM; (E-F) for IPSL-CM5A-MR. The  $r$ -values are given in the plots.

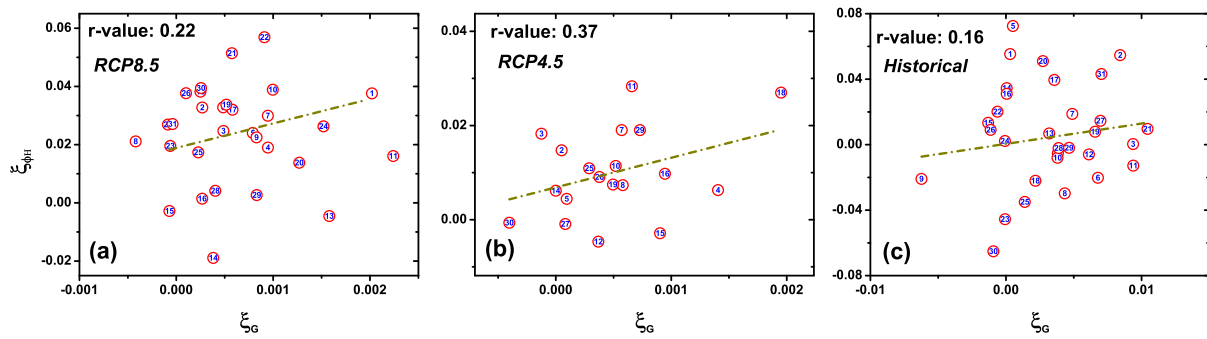

**Fig. S5.** Changes in the width of the HC,  $\xi_{\phi_H}$ , against the width of the network tropical component,  $\xi_G$ , for (a) RCP8.5, (b) RCP4.5 and (c) Historical data. Linear correlation coefficients (*r*-values) are given in the panels.

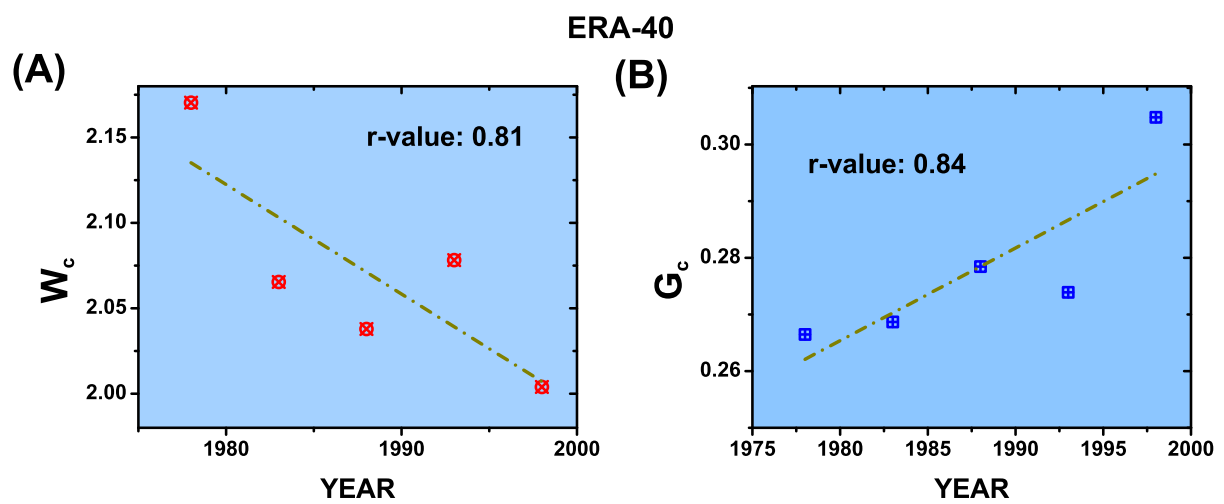

**Fig. S6.** Expansion and weakening of the tropical component for the ERA-40 reanalysis data.  $W_c$  is the weight of the critical link;  $G_c$  is the normalized size of the tropical component just below the  $r_c$ .



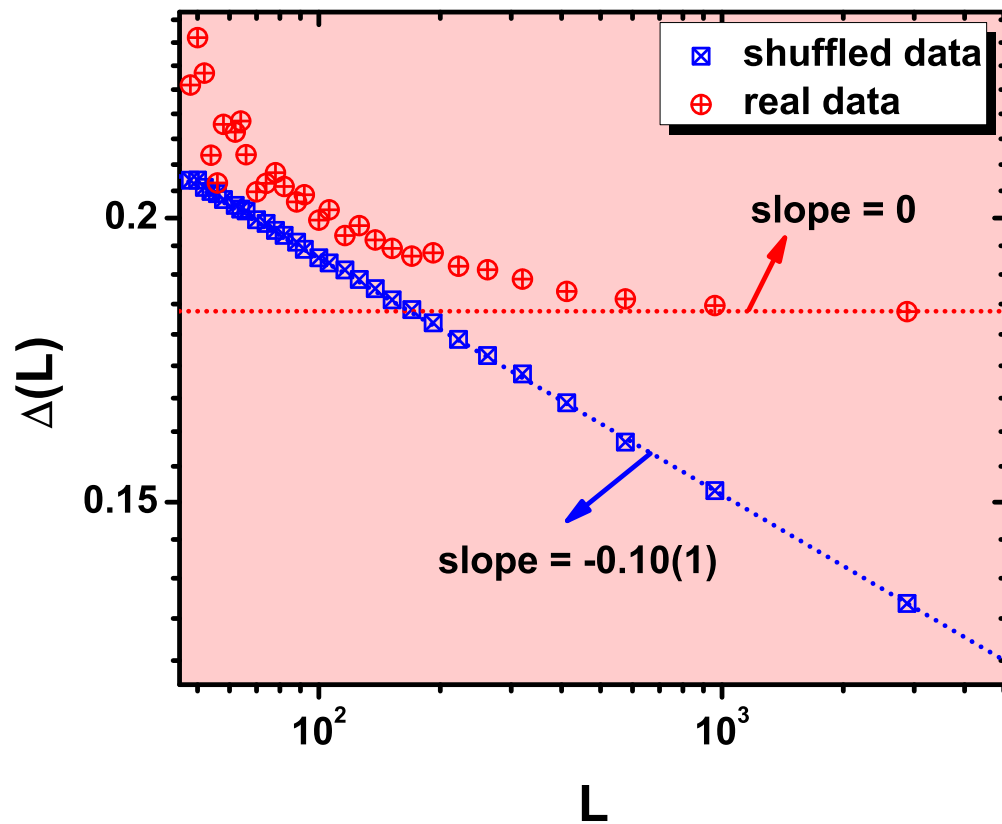

**Fig. S7.** Log-log plot of the largest gap  $\Delta(L)$  versus the network system size  $L$  for original data (red) and shuffled data (blue). For the real data, the slope seems to approach zero for large  $L$ , suggesting a discontinuous phase transition. For the real data,  $L$  is increased simply by increasing the resolution. For the shuffled data, the slope approaches 0.10, which suggests a continuous phase transition with a known critical exponent  $\beta/\nu = 5/48$ .  $L$  is defined as the number of nodes in the zonal direction.

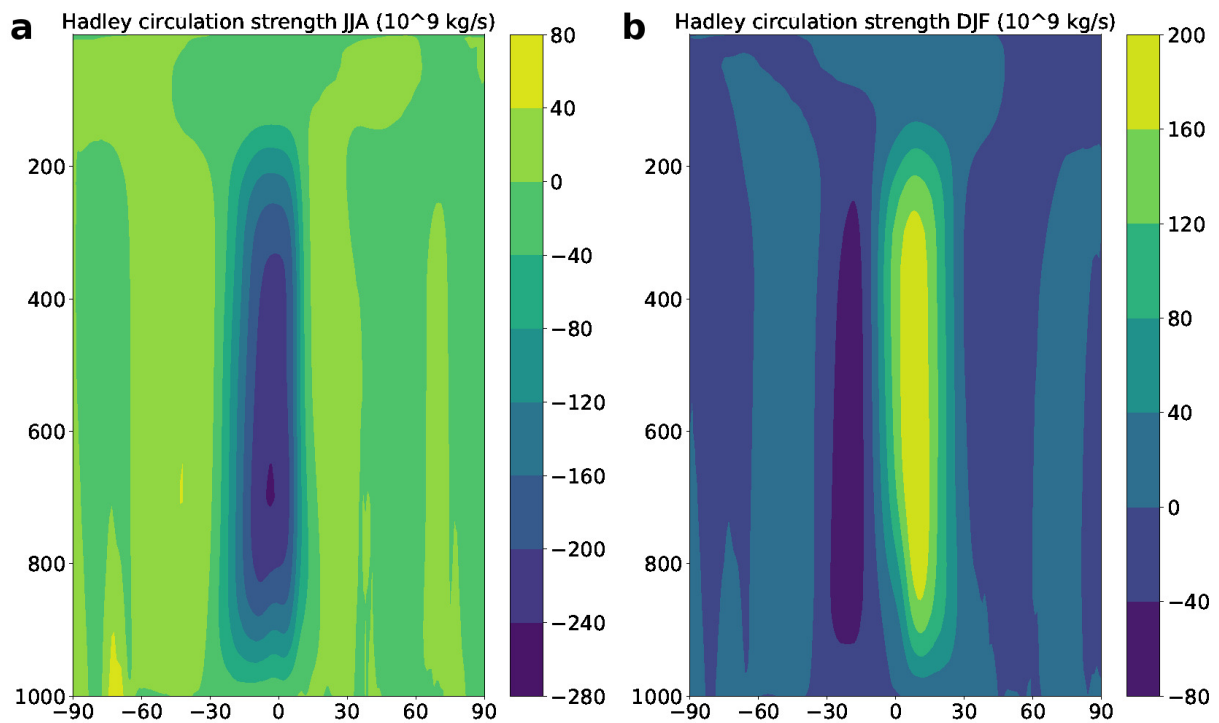

**Fig. S8.** Cross-section of zonal-mean mass streamfunction  $\Psi$  for annual-mean conditions in units of  $10^9 \text{ kg s}^{-1}$  based on 1979-2016 ERA-Interim reanalysis data. (a) For the boreal summer in June-July-August and (b) for the boreal winter in December-January-February.

Movie S1. The dynamical evolution of the climate networks. The links are sorted in decreasing order of strength and then added one by one according to decreasing strength  $W$ ,  $r$  is the fraction number of links,  $G$  is the relative size of the largest cluster (indicated by red color). See main text for more details.
